# Supplementary material for: Endowing the conventional HMPAM hydrogel with pH-responsive and self-healing properties
Source: Royal Society of Chemistry journal article supplement (doi:10.1039/c3ta10285h), 2013-01-01
Supplement: c3ta10285h.pdf [file c3ta10285h.pdf]

## Support information:

### NMR Characterization

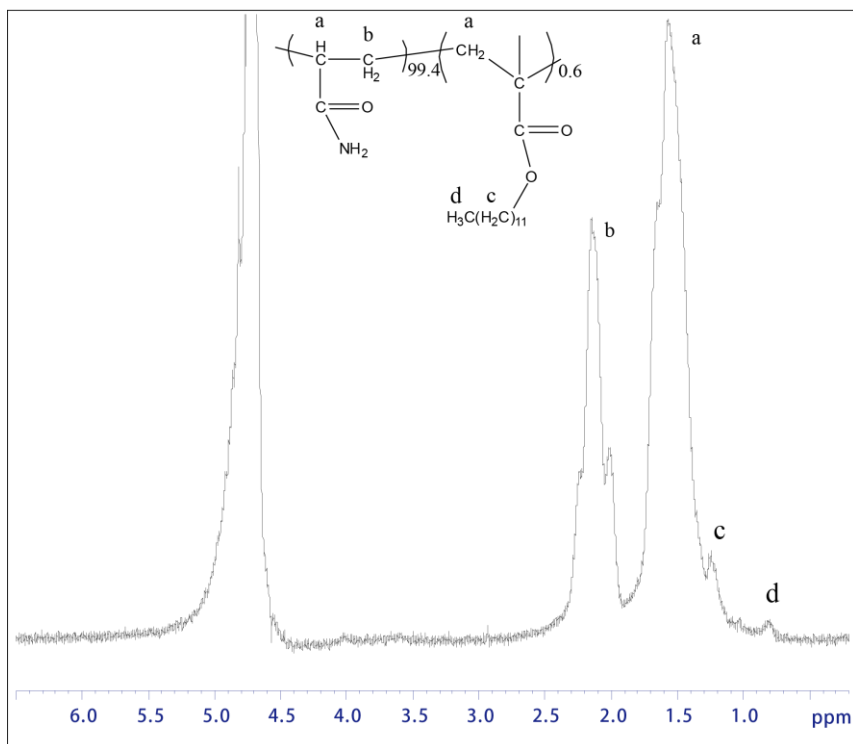

Fig.S1 Proton NMR spectra of hydrophobically modified p(AM/C<sub>12</sub>) polymer. Sample is prepared in D<sub>2</sub>O at a concentration of 5 wt % and left for at least 24 h before measurement.

### Concentration dependency of HMPAM

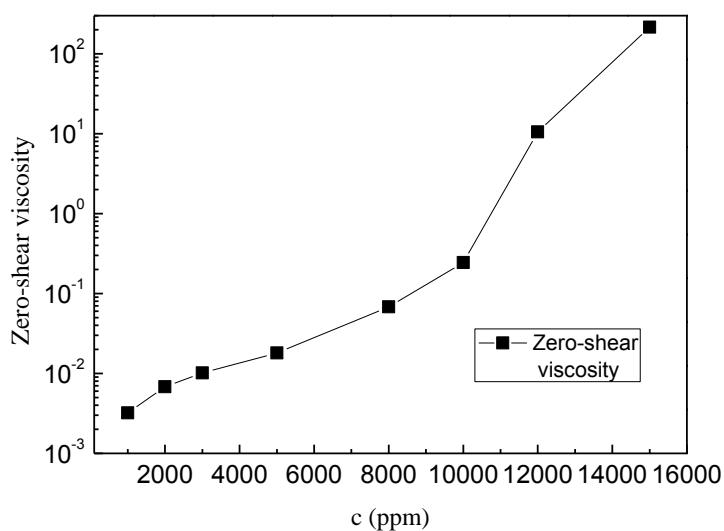

Fig.S2 Zero-shear viscosity as a function of polymer concentration.

## $\zeta$ potential of NaOA

Table.S1 The  $\zeta$ -potential (mV) of NaOA at different pH.  $\zeta$  potentials were measured using a temperature-controlled ZetaSizer 2000 (Malvern Instruments Ltd.) potential analyzer.

| <b>pH</b>                               | <b>8.0</b> | <b>8.3</b> | <b>9.0</b> | <b>10.0</b> |
|-----------------------------------------|------------|------------|------------|-------------|
| <b><math>\zeta</math>-potential(mV)</b> | -109       | -104       | -80.4      | -69.5       |
